# Supplementary material for: Comparison of different mass spectrometric techniques for the determination of polychlorinated biphenyls by isotope dilution using37Cl-labelled analogues
Source: Royal Society of Chemistry journal article supplement (doi:10.1039/c5ay01752a), 2015-01-01
Supplement: c5ay01752a1.pdf [file c5ay01752a1.pdf]

1 **ELECTRONIC SUPPORTING INFORMATION**

2

3 **COMPARISON OF DIFFERENT MASS SPECTROMETRIC TECHNIQUES**  
4 **FOR THE DETERMINATION OF POLYCHLORINATED BIPHENYLS BY**  
5 **ISOTOPE DILUTION USING <sup>37</sup>CL-LABELLED ANALOGUES**

6

7 **Lourdes Somoano-Blanco<sup>a</sup>, Pablo Rodríguez-González<sup>a\*</sup>, Daniel Proefrock<sup>b\*</sup>,**  
8 **Andreas Prange<sup>b</sup>, J. Ignacio García Alonso<sup>a</sup>.**

9 <sup>a</sup>Department of Physical and Analytical Chemistry. Faculty of Chemistry. University of  
10 Oviedo. Julián Clavería 8, 33006 Oviedo, Spain.

11 <sup>b</sup>Helmholtz-Zentrum Geesthacht, Centre for Materials and Coastal Research. Institute  
12 for Coastal Research. Department for Marine Bioanalytical Chemistry. Max-Planck-  
13 Strasse, D-21502 Geesthacht, Germany.

14 \*Authors for correspondence: [rodriguezpablo@uniovi.es](mailto:rodriguezpablo@uniovi.es) ; [daniel.proefrock@hzg.de](mailto:daniel.proefrock@hzg.de)

15

16

17

18

19 **Number of pages: 3**

20 **Number of Tables: 3**

21 **Number of Figures: 0**

22

23

24

25

26

27

28 **Table S1.** Experimental conditions employed in the GC-ICP-MS and GC-ICP-MSMS  
 29 instruments.

| <b>GAS CHROMATOGRAPHY PARAMETERS</b> |                                                                                             |                                          |
|--------------------------------------|---------------------------------------------------------------------------------------------|------------------------------------------|
| <b>Model</b>                         | Agilent 6890                                                                                |                                          |
| <b>Column</b>                        | DB-5MS (15 m, 0.25 mm, 0.1 $\mu$ m)                                                         |                                          |
| <b>Injection mode</b>                | Cool On-column                                                                              |                                          |
| <b>Injection volume</b>              | 1 $\mu$ L                                                                                   |                                          |
| <b>Carrier gas flow</b>              | 2.6 mL min <sup>-1</sup> (He)                                                               |                                          |
| <b>Injection temperature</b>         | 280°C                                                                                       |                                          |
| <b>Oven program</b>                  | 100°C(2min); 30°C/min to 195°C(0 min); 5°C/min to 210°C(0 min); 30°C/min to 300°C(8.83 min) |                                          |
| <b>Interface temperature</b>         | 300 °C                                                                                      |                                          |
| <b>ION SOURCE AND MS PARAMETERS</b>  |                                                                                             |                                          |
|                                      | <b>GC-ICP-MS</b>                                                                            | <b>GC-ICP-MS/MS</b>                      |
| <b>Model</b>                         | Agilent 7700                                                                                | Agilent 8800                             |
| <b>Rf power</b>                      | 900                                                                                         | 800                                      |
| <b>Carrier gas flow rate</b>         | 0.95 L min <sup>-1</sup>                                                                    | 0.95 L min <sup>-1</sup>                 |
| <b>Auxiliary gas pressure</b>        | 30 Psi (N <sub>2</sub> )                                                                    | 30 Psi (N <sub>2</sub> )                 |
| <b>Collision gas flow</b>            | 2 mL min <sup>-1</sup> (He)                                                                 |                                          |
| <b>Reaction Gas flow</b>             |                                                                                             | 2 mL min <sup>-1</sup> (H <sub>2</sub> ) |
| <b>m/z measured</b>                  | 35, 37                                                                                      | 35→37, 37→39                             |
| <b>Ion lens setting</b>              | Daily optimization                                                                          |                                          |

30

31 **Table S2.** Experimental conditions employed in the GC-NCI-MS instrument.

| <b>GC AND INTERFACE PARAMETERS</b>  |                                                                                       |
|-------------------------------------|---------------------------------------------------------------------------------------|
| <b>Model</b>                        | Shimadzu QP2010 Plus                                                                  |
| <b>Column</b>                       | DB-5MS (30m, 0.25mm, 0.25 $\mu$ m)                                                    |
| <b>Injection mode</b>               | Splitless                                                                             |
| <b>Sampling time</b>                | 0.50 min                                                                              |
| <b>Injection volume</b>             | 2 $\mu$ L                                                                             |
| <b>Carrier gas/Flow</b>             | He/ 2 mL/min                                                                          |
| <b>Injection temperature</b>        | 280°C                                                                                 |
| <b>Oven programme</b>               | 80°C(1min); 20°C/min to 220°C(0min); 5°C/min to 232°C(0min); 30°C/min to 300°C(3 min) |
| <b>Interface temperature</b>        | 280°C                                                                                 |
| <b>ION SOURCE AND MS PARAMETERS</b> |                                                                                       |
| <b>Source temperature</b>           | 230°C                                                                                 |
| <b>Source voltage</b>               | 70 eV                                                                                 |
| <b>Emission current</b>             | 150 $\mu$ A                                                                           |
| <b>Reagent gas</b>                  | CH <sub>4</sub>                                                                       |
| <b>Solvent delay</b>                | 4 min                                                                                 |
| <b>Acquisition mode</b>             | SIM                                                                                   |
| <b>Selected m/z</b>                 | 35 and 37                                                                             |

32

33

34

35

36 **Table S3.** Experimental conditions employed in the GC-EI-MSMS instrument.

| <b>CHROMATOGRAPHIC PARAMETERS</b> |                                                                                             |
|-----------------------------------|---------------------------------------------------------------------------------------------|
| <b>Chromatograph</b>              | 7890A Agilent Technologies                                                                  |
| <b>Column</b>                     | DB-5MS (30 m x 0.25 mm i.d. x 0.25 $\mu$ m coating)                                         |
| <b>Carrier gas</b>                | He (2 mL/min)                                                                               |
| <b>Injection mode</b>             | Splitless (2 min of purge time)                                                             |
| <b>Injector temperature</b>       | 280°C                                                                                       |
| <b>Temperature program</b>        | 80°C (1min), 220°C (0 min) at 20°C/min; 232°C (0 min) at 5°C/min; 300°C (3 min) at 30°C/min |
| <b>DETECTOR PARAMETERS</b>        |                                                                                             |
| <b>Detector</b>                   | Agilent 7000                                                                                |
| <b>Ionization current</b>         | 35 $\mu$ A                                                                                  |
| <b>Ionization energy</b>          | 70 eV                                                                                       |
| <b>Source temperature</b>         | 230°C                                                                                       |
| <b>Interface temperature</b>      | 280°C                                                                                       |

37

38
